# Supplementary material for: Tunable platinum–ruthenium nanoparticle properties using microwave synthesis
Source: Royal Society of Chemistry journal article supplement (doi:10.1039/b404280h), 2004-01-01

## Supplementary information

### Tunable platinum-ruthenium nanoparticle properties using microwave synthesis

*Farid Bensebaa\**, *Natasha Patrino*, *Yvon Le Page*, *Pascal L'Ecuyer* and  
*Dashan Wang*

Institute for Chemical Process and Environmental Technology  
National Research Council of Canada  
1200 Montreal Rd, M-12  
Ottawa, ON K1A 0R6  
Canada

---

\* Corresponding author: [Farid.bensebaa@nrc.ca](mailto:Farid.bensebaa@nrc.ca)

Tel. (613) 991-6347; Fax (613) 991-2384

**Fig. 1** TEM image of Ru nanocrystals coated with PVP.

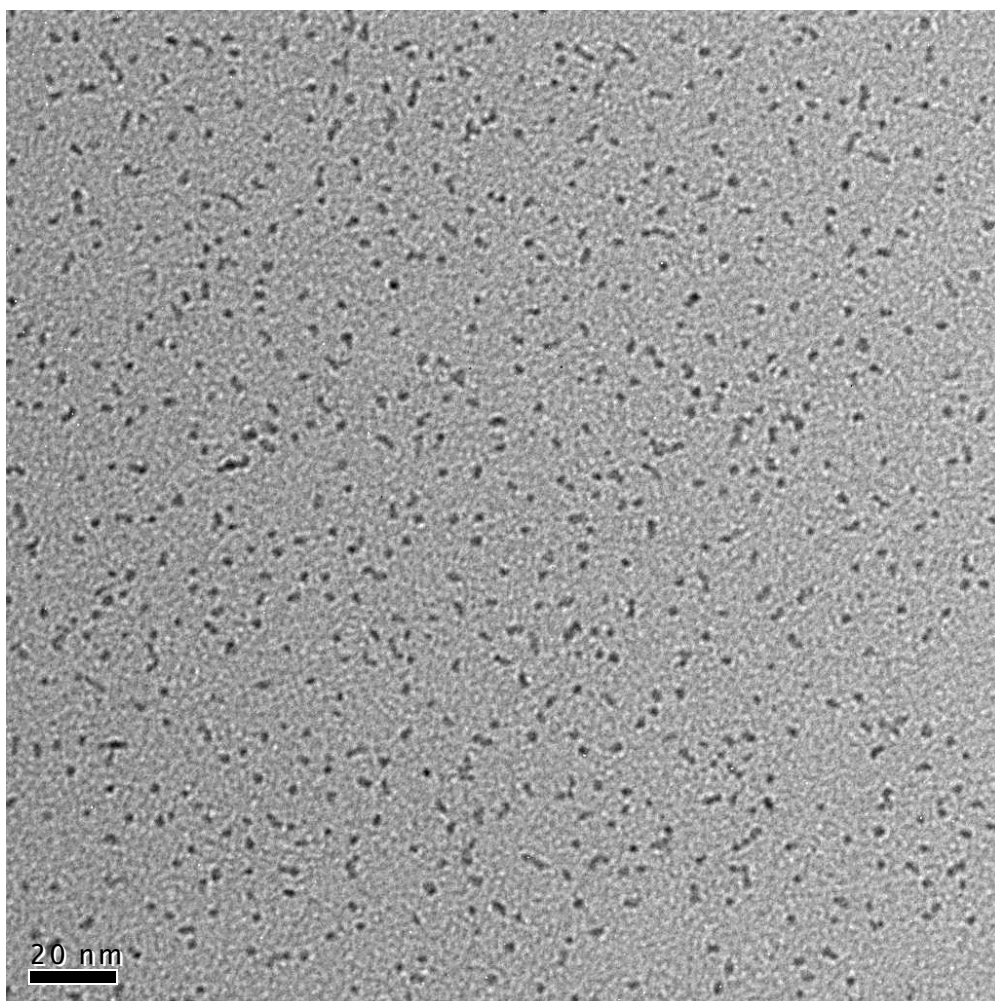

**Fig. 2.** TEM of 50%Pt-50%Ru nanocrystals stabilized in absence of PVP.

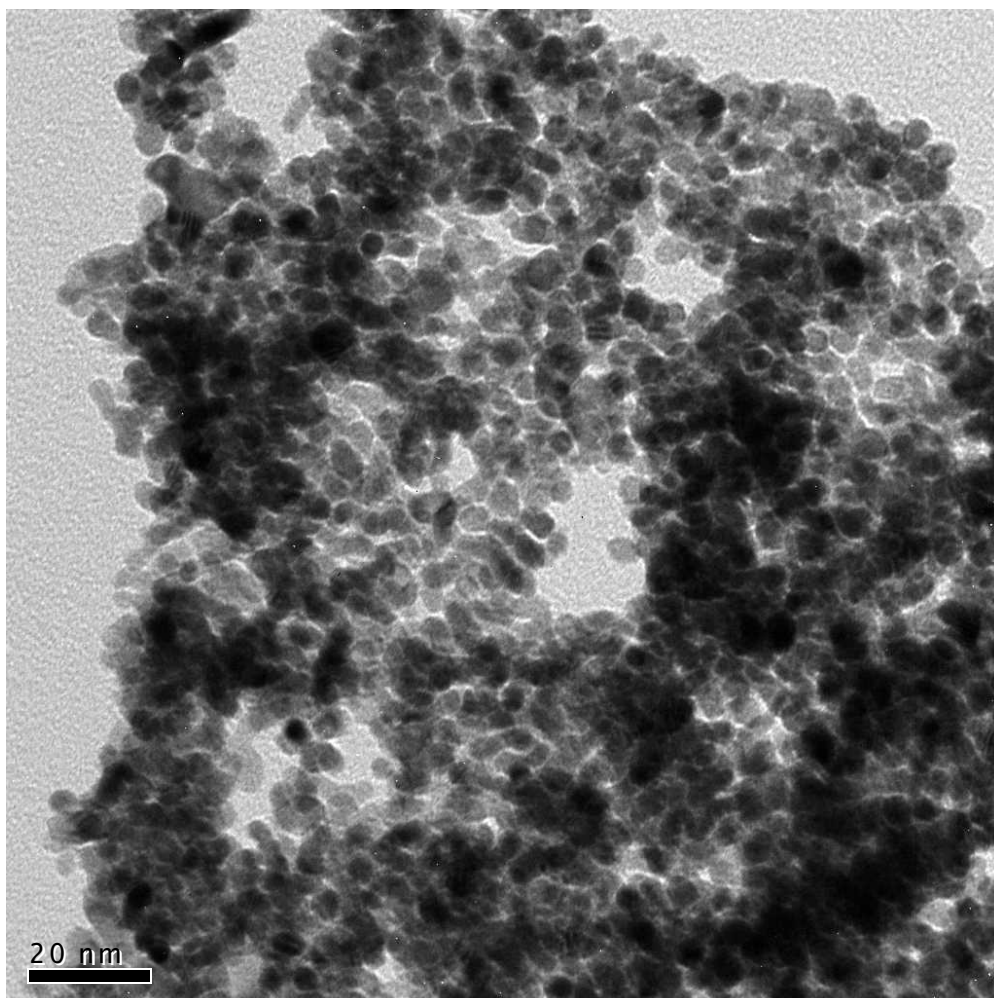

**Fig. 3** EDXA of 50%Pt-50%Ru nanocrystals prepared in absence of PVP.

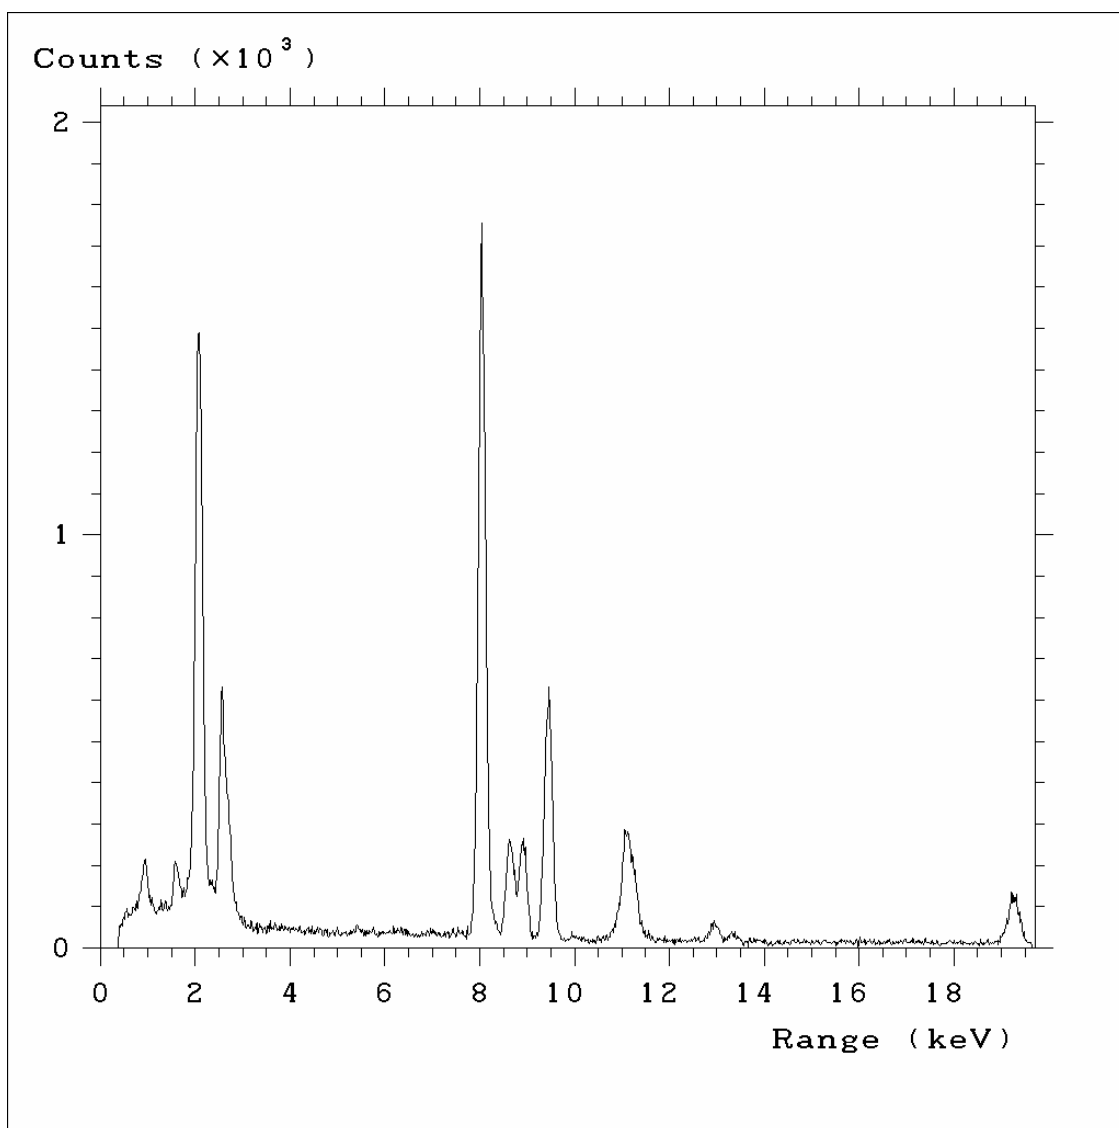

Supplement: b404280h.pdf [file b404280h.pdf]
